# Supplementary material for: Lighting up cysteine and homocysteine in sequence based on the kinetic difference of the cyclization/addition reaction
Source: Royal Society of Chemistry journal article supplement (doi:10.1039/c3ob41414k), 2013-01-01
Supplement: c3ob41414k.pdf [file c3ob41414k.pdf]

## Supporting information

### Lighting up Cysteine and Homocysteine in Sequence Based on Kinetic Difference of Cyclization/Addition Reaction

*Fuqiang Guo<sup>1</sup>, Minggang Tian<sup>1</sup>, Fang Miao<sup>1</sup>, Weijia Zhang<sup>1</sup>, Guofen Song<sup>1</sup>, Yong Liu<sup>1</sup>, Xiaoqiang Yu<sup>1,\*</sup>, Jing Zhi Sun<sup>2,\*</sup> and Wai-Yeung Wong<sup>3,\*</sup>*

<sup>1</sup>Center of Bio & Micro/Nano Functional Materials, State Key Laboratory of Crystal Materials, Shandong University, Jinan, 250100, PR China

<sup>2</sup>MoE Key Laboratory of Macromolecule Synthesis and Functionalization, Department of Polymer Science and Engineering, Institute of Biomedical Macromolecules, Zhejiang University, Hangzhou, 310027, PR China

<sup>3</sup>Institute of Molecular Functional Materials and Department of Chemistry and Institute of Advanced Materials, Hong Kong Baptist University, Waterloo Road, Kowloon Tong, Hong Kong, PR China

## Table of contents

### Materials and Methods

### Spectroscopic Measurements

### Cell Culture and Staining

### Fluorescence Imaging

### Cell-Viability Assay

|                 |           |
|-----------------|-----------|
| Figure S1.....  | S1        |
| Figure S2.....  | S2        |
| Figure S3.....  | S3        |
| Figure S4.....  | S4        |
| Figure S5.....  | S5        |
| Scheme S1.....  | scheme S1 |
| Figure S6.....  | S6        |
| Figure S7.....  | S7        |
| Figure S8.....  | S8        |
| Figure S9.....  | S9        |
| Figure S10..... | S10       |
| Figure S11..... | S11       |
| Figure S12..... | S12       |
| Figure S13..... | S13       |
| Table S1.....   | table S1  |
| Figure S14..... | S14       |
| Figure S15..... | S15       |
| Figure S16..... | S16       |
| Figure S17..... | S17       |
| Synthesis       |           |
| Figure S18..... | S18       |
| Figure S19..... | S19       |
| Figure S20..... | S20       |
| Figure S21..... | S21       |

## Materials

All chemicals used are of analytical grade, carbazole and NBS were purchased from Sinopharm Chemical Reagent Co., Ltd (Shanghai, China). Palladium (II) acetate and tri-*o*-tolylphosphine were purchased from J&K Chemical (Beijing, China). GSH, DTT, amino acids and PBS were purchased from Seikagaku Corporation (Japan). The solvents used in the spectral measurement are of chromatographic grade. All spectroscopic measurements of **CB1** were performed in ethanol/phosphate buffer solution with pH = 7.4 and v/v of 4:1. TLC analyses were performed on silica gel plates and column chromatography was conducted over silica gel (mesh 200–300), both of which were obtained from Qingdao Ocean Chemicals.

## Methods

Nuclear magnetic resonance spectra ( $^1\text{H}$  and  $^{13}\text{C}$ ) were obtained on a Bruker Avance 400 spectrometer. The following abbreviations were used to explain the multiplicities: s = singlet; d = doublet; t = triplet; q = quartet; m = multiplet; br = broad. The HRMS spectra were recorded on Agilent Technologies 6510 Q-TOF LC/MS or ThermoFisher LCQ FLEET. The elemental analyses were performed on a Perkin-Elmer 2400 instrument.

## Spectroscopic Measurements

The UV-visible to near-IR absorption spectra of dilute solutions were recorded on a U2910 spectrophotometer using a quartz cuvette having 1 cm path length. IR spectra were measured on Nexus 670. One-photon fluorescence spectra were obtained on a HITACH F-2700 spectrofluorimeter equipped with a 450-W Xe lamp. Two-photon ones were measured on a SpectroPro300i and the pump laser beam came from a mode-locked Ti:sapphire laser system at the pulse duration of 200 fs, a repetition rate of 76 MHz (Coherent Mira900-D).

## Cell Culture and Staining

SiHa cells were grown in H-DMEM (Dulbecco's Modified Eagle's Medium, High Glucose) supplemented with 10% FBS (Fetal Bovine Serum) in a 5%  $\text{CO}_2$  incubator at 37 °C. Cells ( $1 \times 10^5$  / mL) were placed on glass coverslips and allowed to adhere for 24 h. For living cells imaging experiment of **CB1**, cells were incubated with 1  $\mu\text{M}$  **CB1** in the culture medium for 40 min and 24 h at 37 °C, respectively. After rinsing with PBS three times, cells were imaged immediately. For *N*-ethylmaleimide (NEM) treated experiment, SiHa cells were pretreated with a DMSO-PBS (1:49, v/v, pH = 7) solution of 10 mM NEM for 40 min in a 5%  $\text{CO}_2$  incubator at 37 °C, and then incubated with 1  $\mu\text{M}$  **CB1** in the culture medium for 40 min and 24 h at 37 °C. Fluorescence imaging was then carried out after washing cells with the PBS buffer.

## Fluorescence Imaging

Wide-field fluorescence microscopy images were acquired with an Olympus IX71 inverted microscope coupling with CCD and display controller software. The fluorescence of **CB1** was excited and collected through U-MNIBA3 and U-MWU2, respectively.

Two-photon fluorescence imaging were obtained with Olympus FV 300 Laser Confocal Microscope with a 60 $\times$  water-immersion objective lens (N.A. = 1.25). Emission was collected with a beam splitter IF565 nm, BA510–540 nm or BA430–460 nm band pass filter combination. In two-photon experiment, the excitation wavelength used was 760 nm from a Ti:sapphire femtosecond laser source (Coherent Chameleon Ultra), and the incident power on samples was modified by means of an attenuator and examined with Power Monitor (Coherent).

## Cell-Viability Assay

The study of the effect of CB1 on viability of cells was carried out using the methylthiazolyldiphenyl-tetrazolium bromide (MTT) assay.<sup>[S1]</sup> SiHa cell cultures were grown in 96-well plates (ca.  $1 \times 10^4$  cells/well) in DMEM containing 10% bovine calf serum in a 5% CO<sub>2</sub> incubator at 37 °C. For examining the short-term cytotoxic effect, cells were then incubated with CB1 at 1  $\mu$ M for 1 and 24 h, and then MTT assay was used as described. Non-treated cells were used as the control. Each individual cytotoxic experiment was repeated for three times.

## Photostability Experiments.<sup>[S2]</sup>

The photostability test was carried out in square cross-section quartz cells (1  $\times$  1 cm) and solutions of the samples were irradiated under full Xe arc light at room temperature. To eliminate the heat and absorb short wavelength light, a cold trap (3 L solution of 60 g/L NaNO<sub>2</sub> in 8 cm (width)  $\times$  25 cm (length)  $\times$  20 cm (height)) was set up between the cells and the lamp. The distance between the cells and the lamp was 15 cm. Fluorescent intensities were captured every 5 min.

## References:

- [1] J. M. Edmondson, L. S. Armstrong and A. O. Martinez, *J. Tissue Cult. Methods*. 1988, **11**, 15–17.
- [2] S. Zhang, T. Wu, J. L. Fan, Z.Y. Li, N. Jiang, J. Y. Wang, B. R. Dou, S. G. Sun, F. L. Song and X. J. Peng, *Org. Biomol. Chem.* 2013, **11**, 555–558.

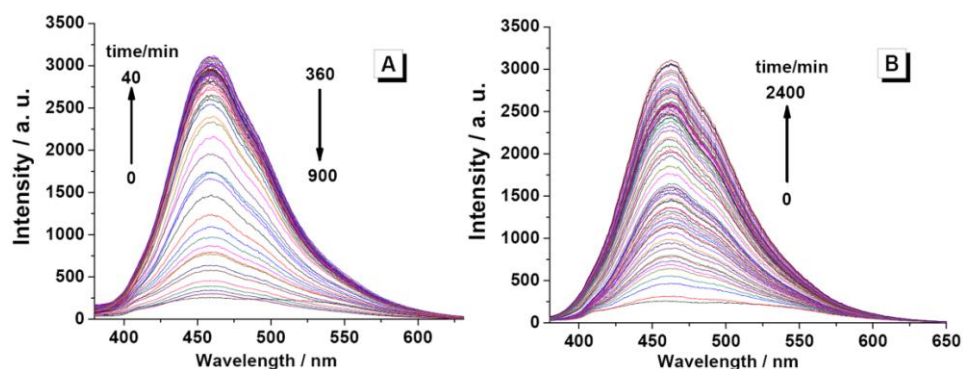

Figure S1. Fluorescence spectra of **CB1**+Cys (A) and **CB1**+Hcy (B) at different time in EtOH/PBS buffer solution (v/v 4:1, 20 mM, pH 7.4) at room temperature. (A: 0~900 min; B: 0~2400 min)

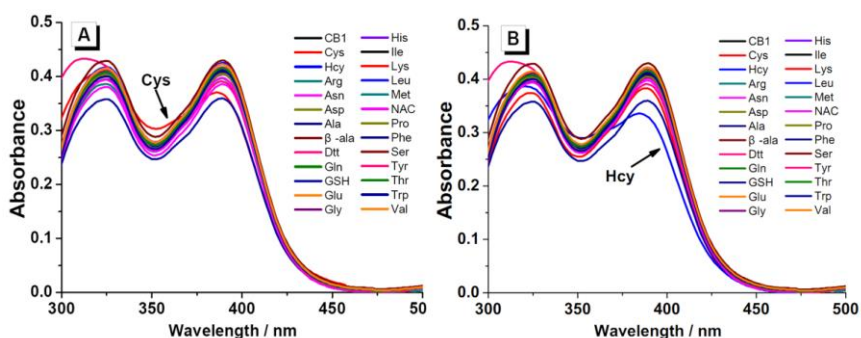

Figure S2. Absorption spectra for **CB1** (10  $\mu$ M) in the absence and presence of various bioanalytes (600  $\mu$ M) in EtOH/PBS buffer solution (v/v 4:1, 20 mM, pH 7.4) at room temperature. A: at 40 min and B: at 24 h.

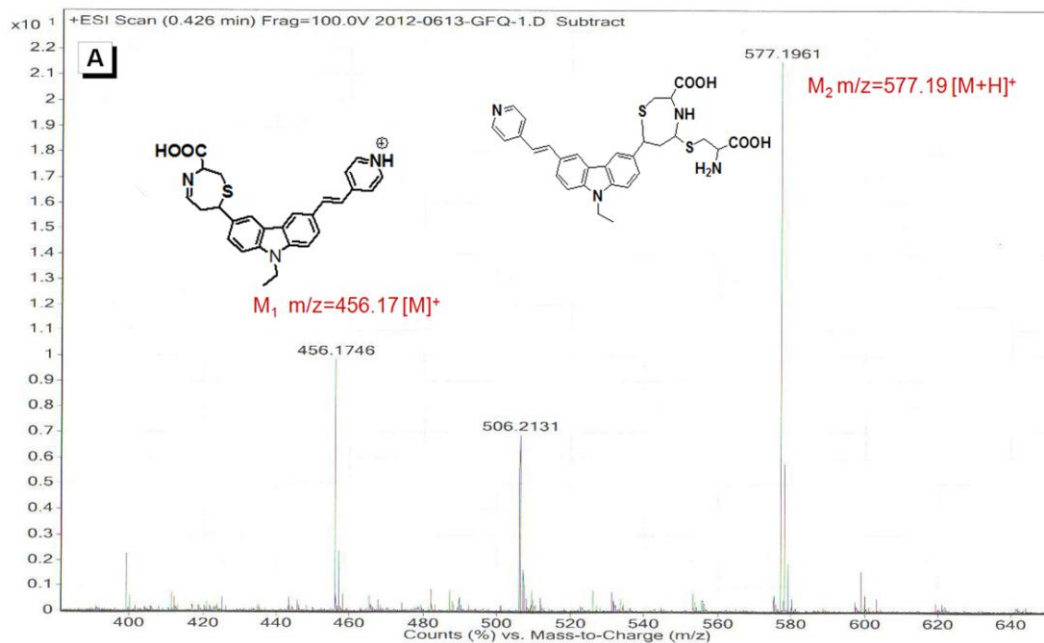

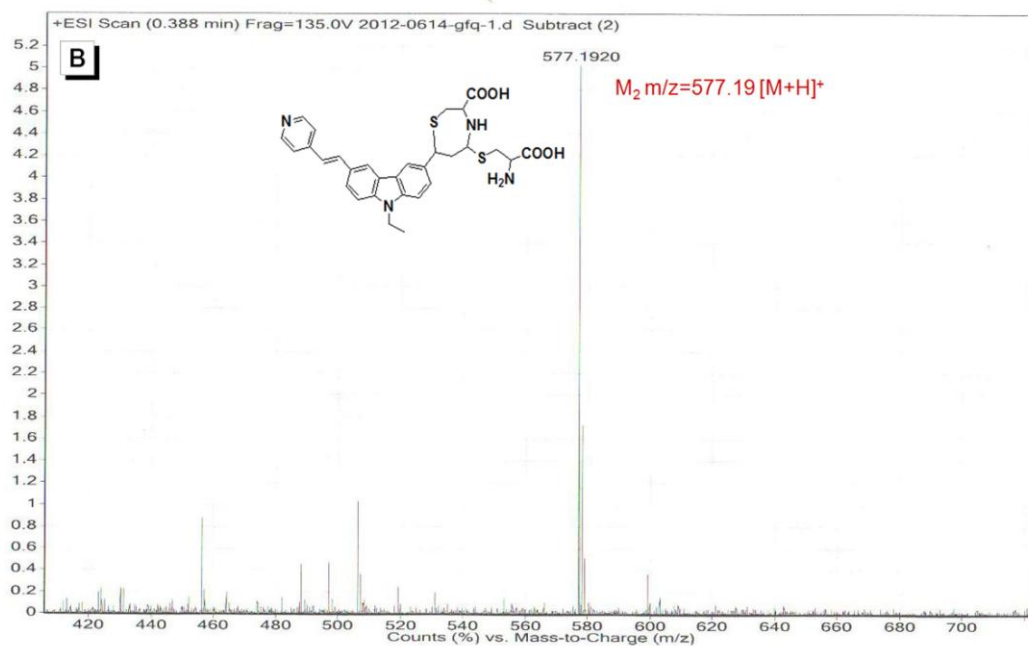

Figure S3. HRMS of **CB1** (10  $\mu$ M) in the presence of Cys (600  $\mu$ M) in EtOH at different time. A: 2 h, B: 24 h.

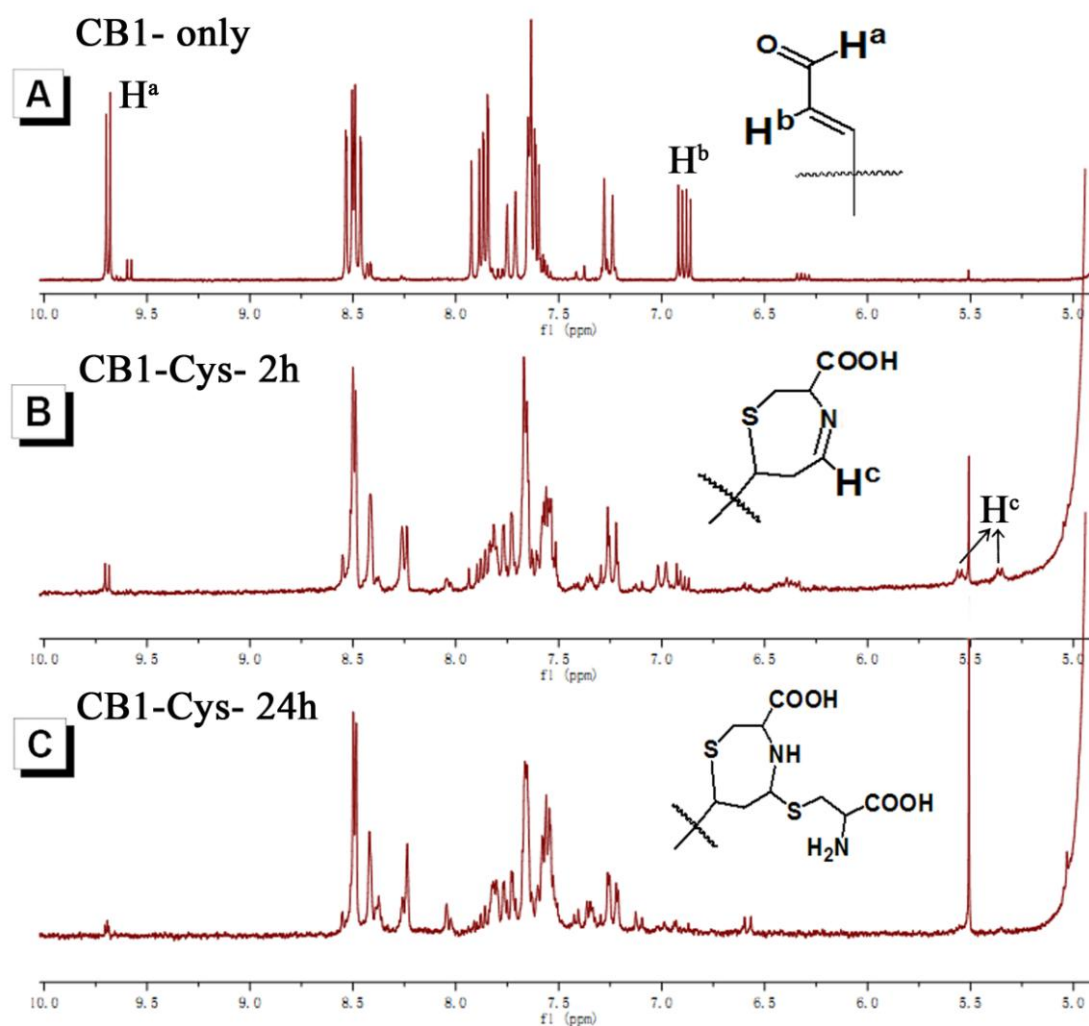

Figure S4.  $^1\text{H}$  NMR spectra of **CB1** with Cys (n/n 1:2) in  $\text{CD}_3\text{OD}$  at different time.

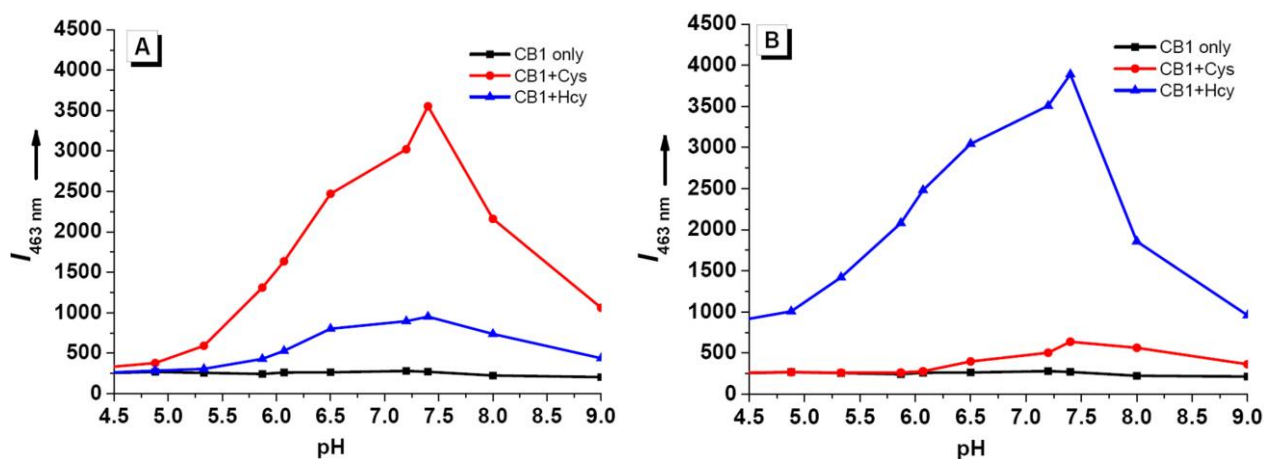

Figure S5. Fluorescence intensity at 463 nm of CB1 (10  $\mu\text{M}$ ), CB1 (10  $\mu\text{M}$ ) + Cys (600  $\mu\text{M}$ ) and CB1 (10  $\mu\text{M}$ ) + Hcy (600  $\mu\text{M}$ ) in EtOH/PBS buffer solution (v:v, 4:1) at different pH values.  $\lambda_{\text{ex}}$  = 365 nm. A: 40 min, B: 24 h.

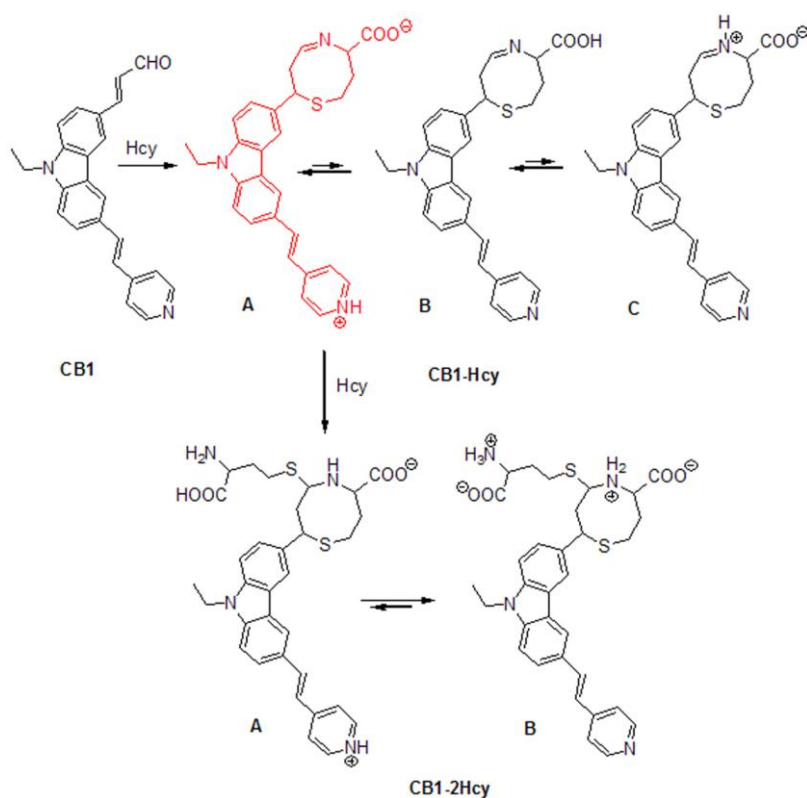

**Scheme S1.** Proposed mechanism for the reaction between **CB1** and Hcy.

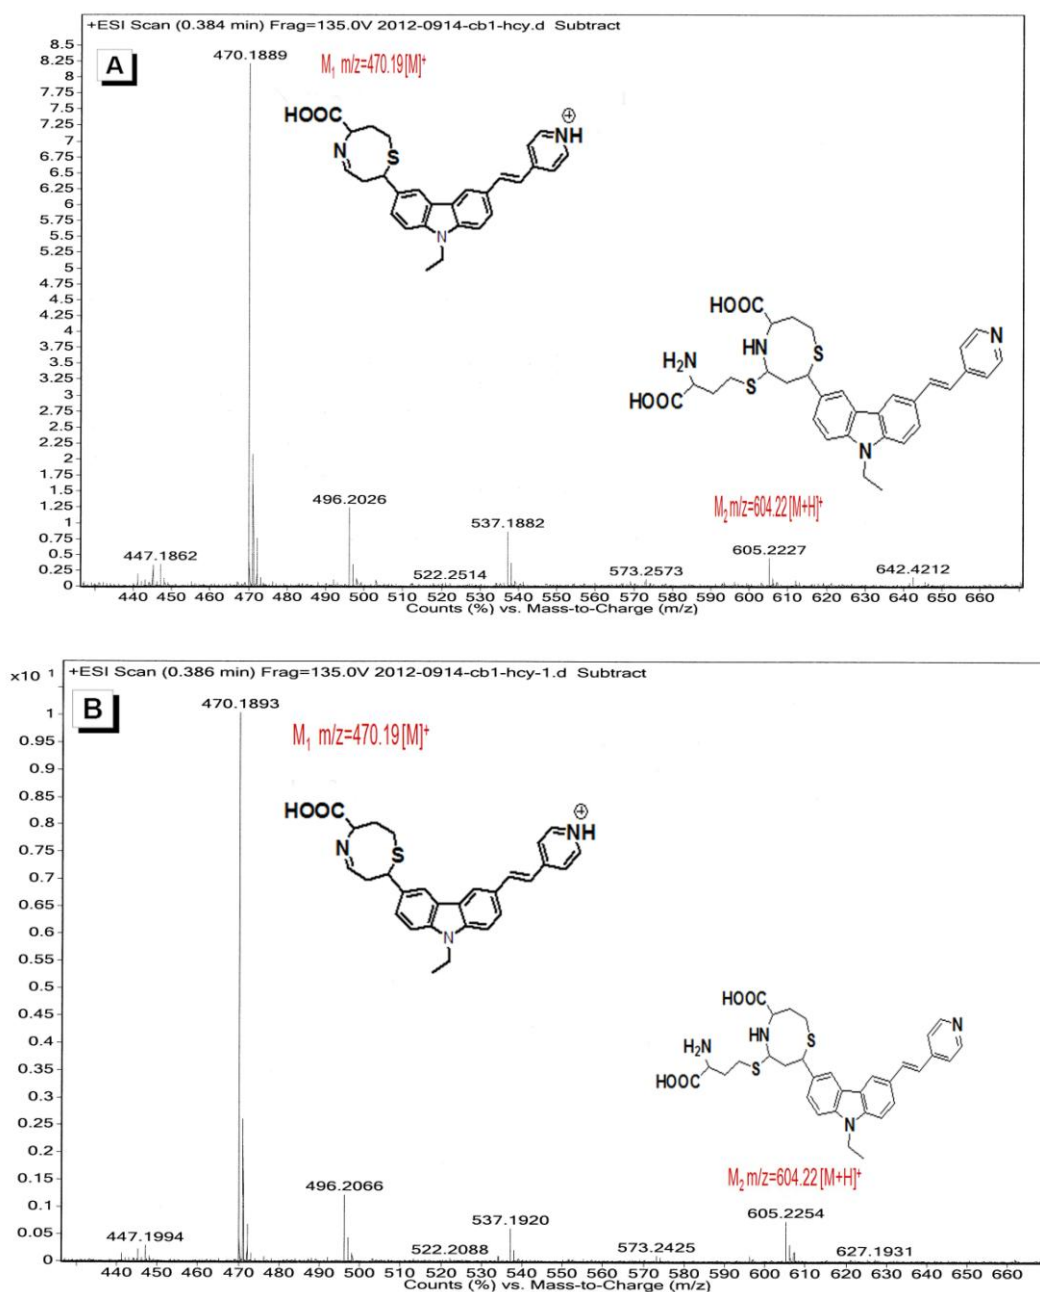

Figure S6. HRMS of **CB1** (10  $\mu$ M) in the presence of Hcy (600  $\mu$ M) in EtOH at different time. A: 24 h, B: 36 h.

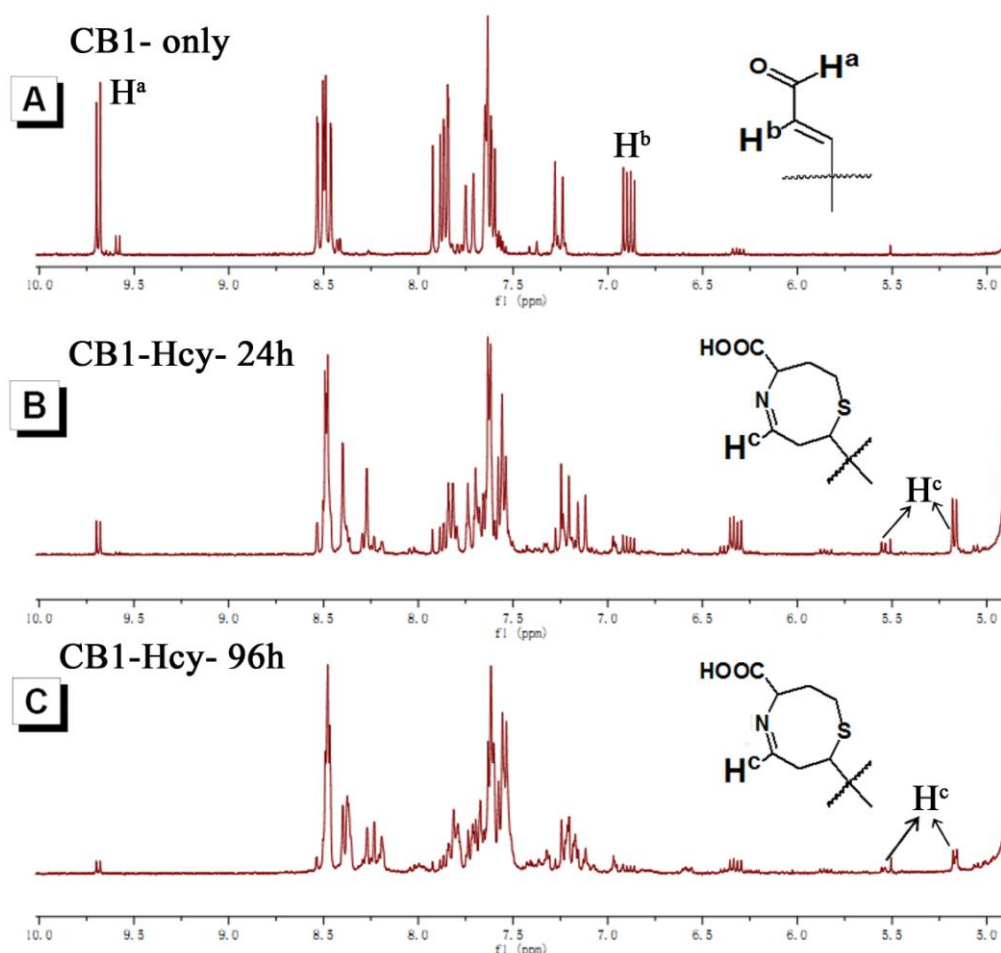

Figure S7.  $^1\text{H}$  NMR spectra of **CB1** with Hcy (n/n 1:2) in  $\text{CD}_3\text{OD}$  at different time.

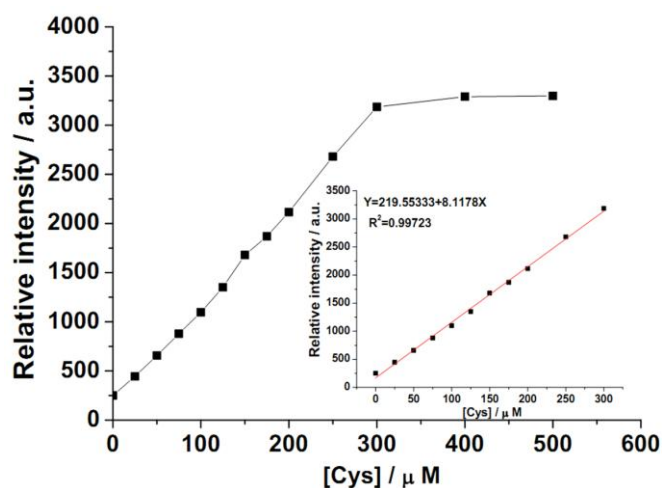

Figure S8. SPEF intensity change spectra of **CB1** (10  $\mu\text{M}$ ) at 463 nm in various concentrations of Cys (0–500  $\mu\text{M}$ ) at 40 min in EtOH/PBS buffer solution (v/v 4:1, 20 mM, pH 7.4). Inset: Plot of fluorescence intensity as a function of Cys concentration (0–300  $\mu\text{M}$ ). The detection limit of Cys is 59.8  $\mu\text{M}$ .  $\lambda_{\text{ex}} = 365$  nm.

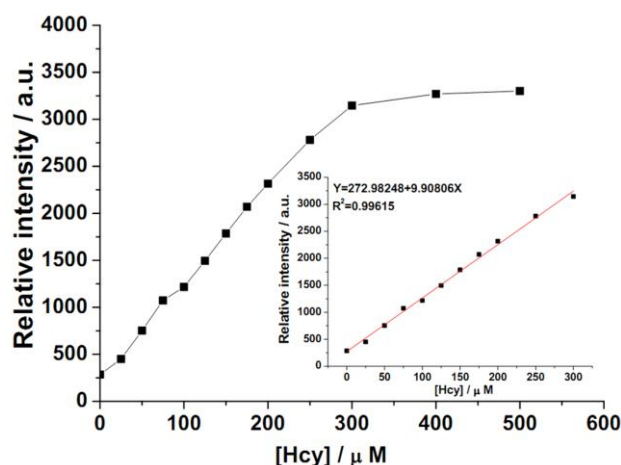

Figure S9. SPEF intensity change spectra of **CB1** (10 μM) at 463 nm in various concentrations of Hcy (0–500 μM) at 24 h in EtOH/PBS buffer solution (v/v 4:1, 20 mM, pH 7.4). Inset: Plot of fluorescence intensity as a function of Hcy concentration (0–300 μM). The detection limit of Hcy is 58.6 μM.  $\lambda_{\text{ex}} = 365$  nm.

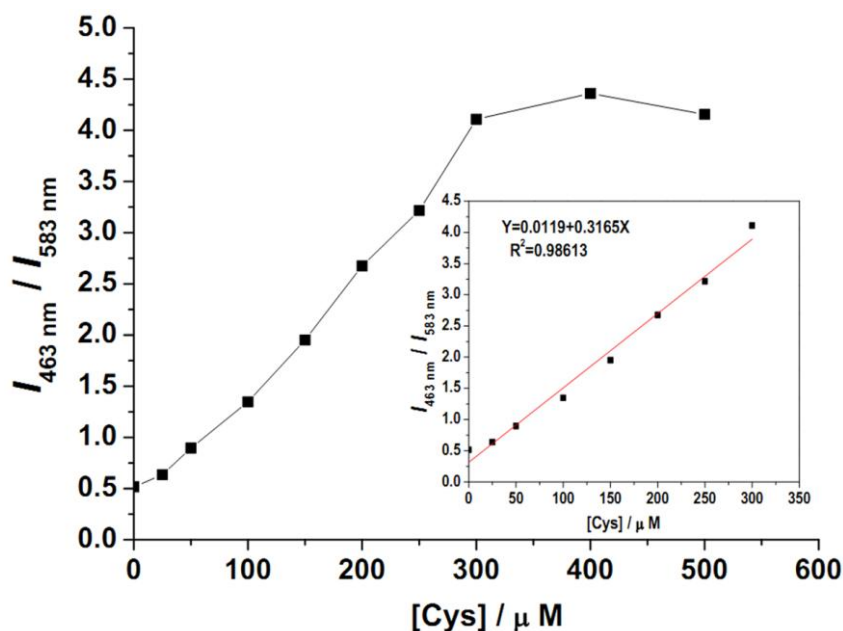

Figure S10. TPEF intensity ratio change of **CB1** (10 μM) in various concentrations of Cys (0–500 μM) at 40 min in EtOH/PBS buffer solution (v/v 4:1, 20 mM, pH 7.4). Inset: Plot of fluorescence intensity as a function of Cys concentration (0–300 μM). The detection limit of Cys is 3.2 μM.  $\lambda_{\text{ex}} = 365$  nm.

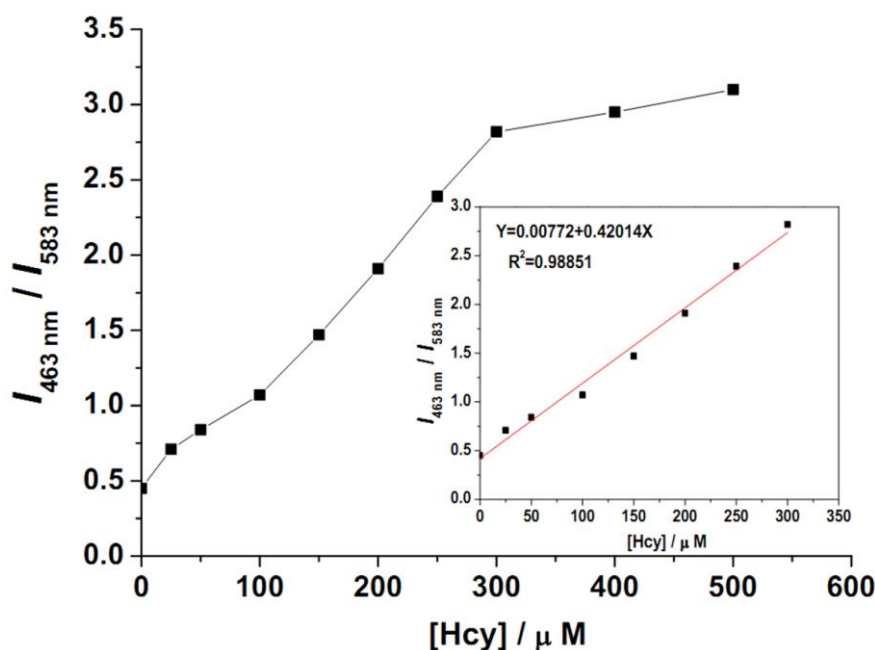

Figure S11. TPEF intensity ratio change of **CB1** (10  $\mu\text{M}$ ) in various concentrations of Hcy (0–500  $\mu\text{M}$ ) at 24 h in EtOH/PBS buffer solution (v/v 4:1, 20 mM, pH 7.4). Inset: Plot of fluorescence intensity as a function of Hcy concentration (0–300  $\mu\text{M}$ ). The detection limit of Hcy is 4.8  $\mu\text{M}$ .  $\lambda_{\text{ex}} = 365 \text{ nm}$ .

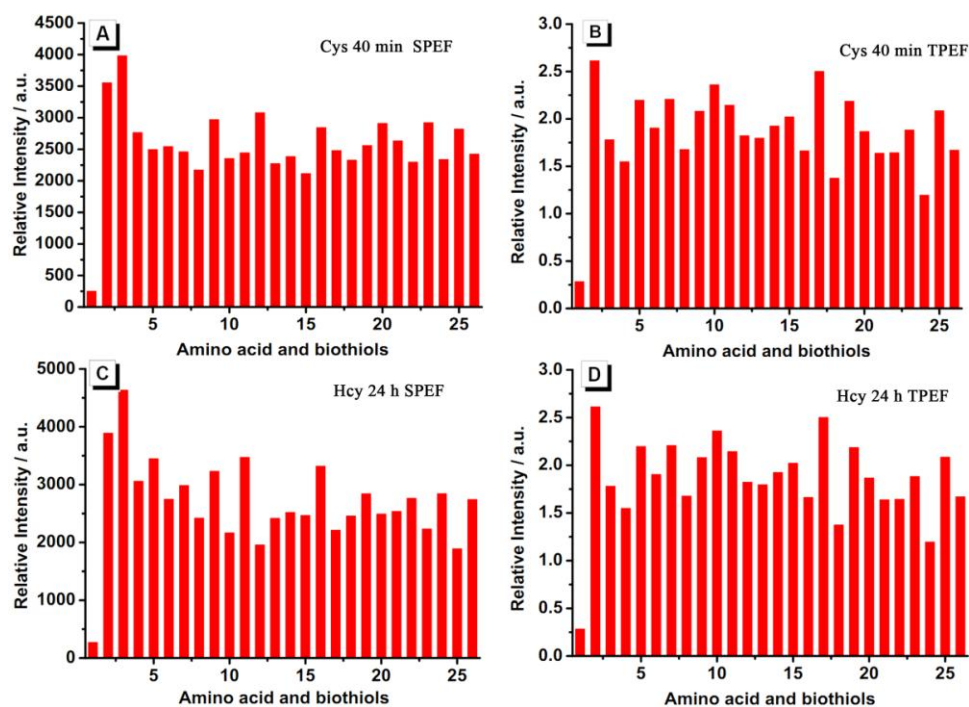

Figure S12. One- (A, C) and two-photon (B, D) excited fluorescence intensity at 463 nm of **CB1** (10  $\mu\text{M}$ ) in EtOH/PBS buffer solution (v/v 4:1, 20 mM, pH 7.4) with various bioanalytes (600  $\mu\text{M}$ ) in the presence of Cys (A, B) or Hcy (C, D). From left to right: 1: **CB1** without Hcy/Cys, 2: **CB1**+Cys/Hcy, 3: 2+Cys (C, D) or Hcy (A, B), 4: 2+Arg, 5: 2+Asn, 6: 2+Asp, 7: 2+Ala, 8: 2+ $\beta$ -ala, 9: 2+DTT, 10: 2+Gln, 11: 2+GSH, 12: 2+Glu, 13: 2+Gly, 14: 2+His, 15: 2+Ile, 16: 2+Lys, 17: 2+Leu, 18: 2+Met, 19: 2+NAC, 20: 2+Pro, 21: 2+Phe, 22: 2+Ser, 23: 2+Tyr, 24: 2+Thr, 25: 2+Trp, 26: 2+Val. Excitation wavelength: SPEF, 365 nm; TPEF, 760 nm.

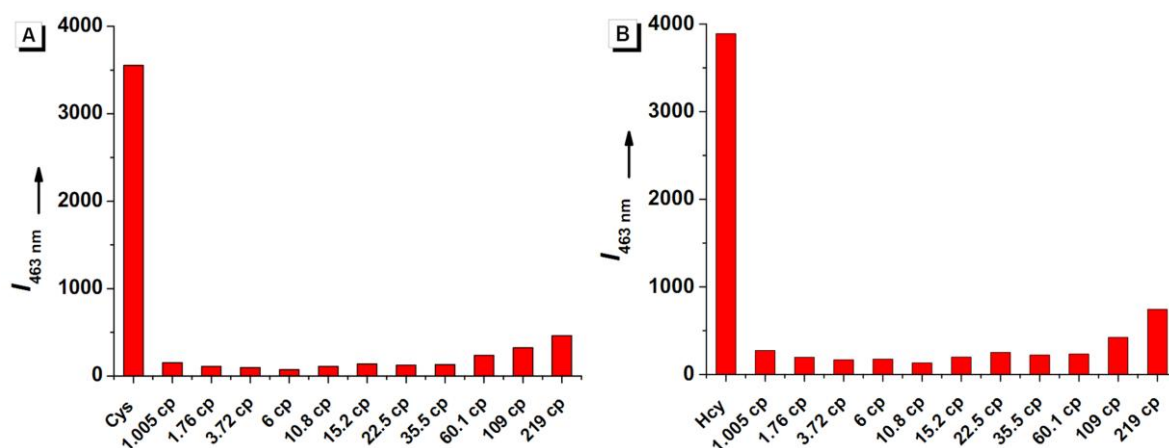

Figure S13. Fluorescence intensity at 463 nm of **CB1** (10  $\mu\text{M}$ ) with Cys/Hcy (600  $\mu\text{M}$ ) in EtOH/PBS buffer solution (v/v 4:1, pH 7.4,  $\eta$  2.037 cp) and free probe in different viscosity values (glycerol/aqueous solution, 1.005~219 cp,  $\lambda_{\text{ex}}$  = 365 nm) at different time. A: 40 min, B: 24 h.

Table S1. Cytotoxicity Data (SiHa, 1 $\mu\text{M}$ )<sup>a</sup>

| incubate time   | 1 h   | 24 h        | 36 h        |
|-----------------|-------|-------------|-------------|
| % cell survival | 100 % | 93 $\pm$ 3% | 83 $\pm$ 3% |

<sup>a</sup> Cell viability was quantified by the MTT assay (mean  $\pm$  SD).

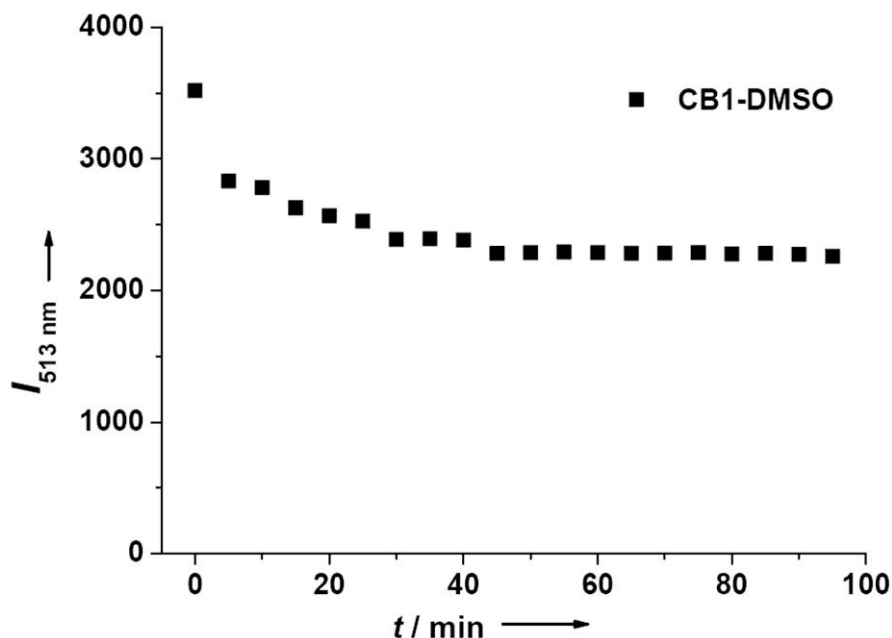

Figure S14. Photostability of **CB1**. **CB1** (10 $\mu\text{M}$ ) was dissolved in DMSO, and fluorescent intensities were captured every 5 minutes with  $\lambda_{\text{ex}}$  = 365 nm.

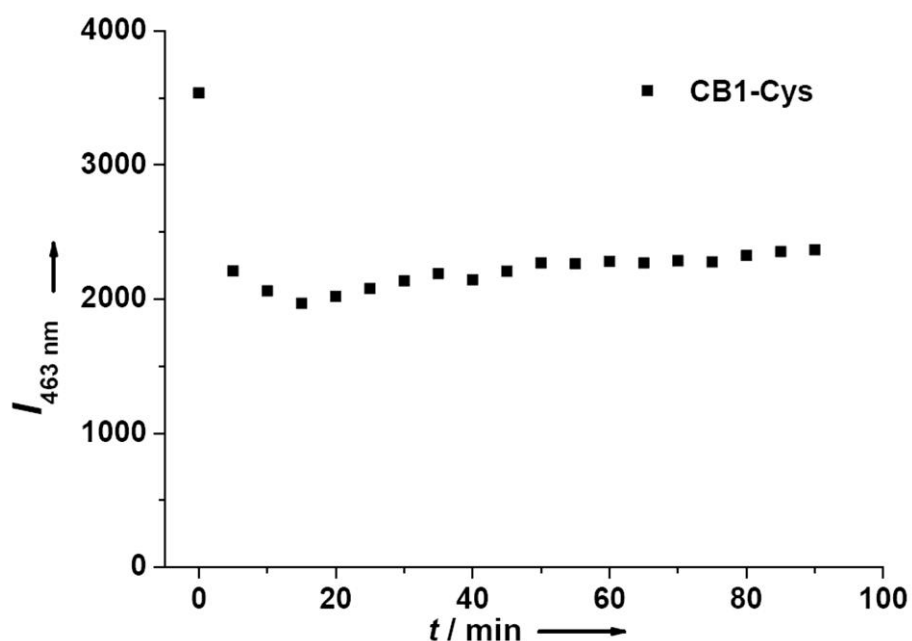

Figure S15. Photostability of **CB1**+Cys after 40 min. **CB1** (10  $\mu$ M) and Cys (600  $\mu$ M) were in EtOH/PBS buffer solution (v/v 4:1, 20 mM, pH 7.4), and after 40 min fluorescent intensities were captured every 5 minutes with  $\lambda_{\text{ex}} = 365$  nm.

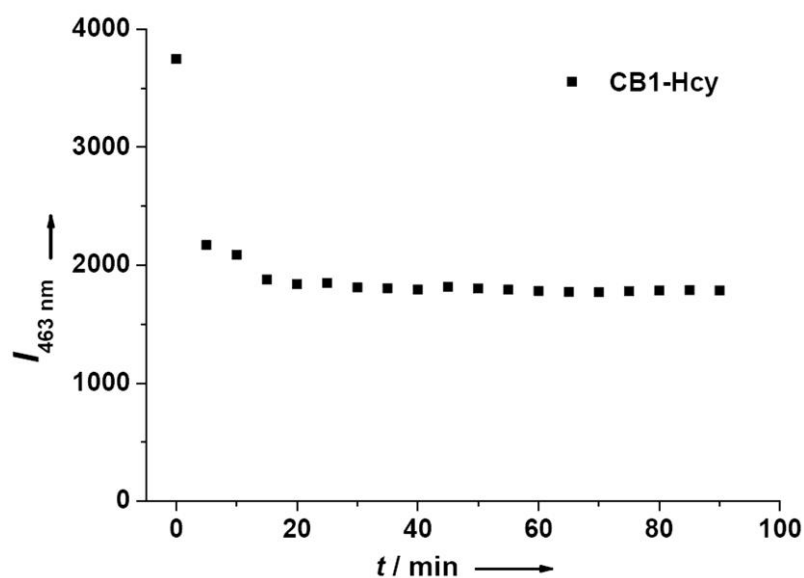

Figure S16. Photostability of **CB1**+Cys after 24 h. **CB1** (10  $\mu$ M) and Hcy (600  $\mu$ M) were in EtOH/PBS buffer solution (v/v 4:1, 20 mM, pH 7.4), and after 24 h fluorescent intensities were captured every 5 minutes with  $\lambda_{\text{ex}} = 365$  nm.

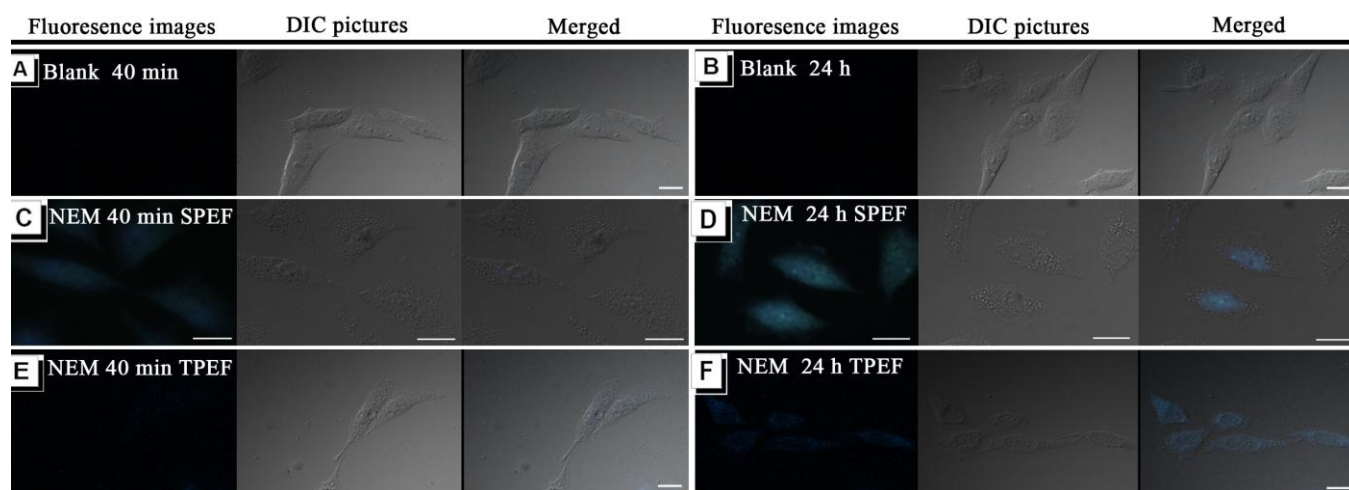

Figure S17. Fluorescence images of SiHa cells treated with 5 mM *N*-ethylmaleimide for 0.5 h at 37 °C and then incubated with **CB1** (1 μM) for 40 min and 24 h at 37 °C. (SPEF:  $\lambda_{\text{ex}}$  = 330–385 nm,  $\lambda_{\text{em}}$  > 410 nm; TPEF:  $\lambda_{\text{ex}}$  = 760 nm).

## Synthesis of CB1

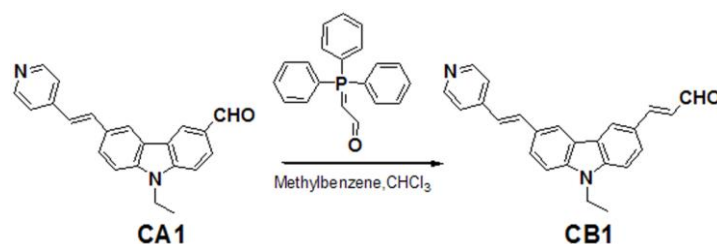

### Synthesis of hexenal -6-[2'-*para*-pyridylethenyl-9-ethylcarbazole] (CB1):

Compound **CA1**<sup>[S3]</sup> (0.61 g, 2.0 mmol) was dissolved in 40 mL of methylbenzene, then added into a flask and bubbled with argon for 30 min. A solution of triphenylphosphoranylidenetriphenylmethane (182.62 mg, 0.6 mmol) in chloroform (10 ml) was added into the system. The mixture was then bubbled with argon for 30 min and heated at 110 °C for 28 h under the protection of argon and a brownish red suspension was obtained. The mixture was distilled to remove solvent, then poured into H<sub>2</sub>O (500 mL) and extracted with CH<sub>2</sub>Cl<sub>2</sub> after the resulting mixture was cooled to room temperature. The organic phase was separated, dried with MgSO<sub>4</sub> and removed by vacuum distillation. The title product was obtained after the residue was purified by column chromatography with ethyl acetate/petroleum ether (1:10, v/v) as eluent with a yield of 16.2%. <sup>1</sup>H NMR (400 MHz, CD<sub>3</sub>OD): δ (ppm) 9.69 (s, 1H), 8.54–8.46 (m, 4H), 7.92–7.84 (m, 3H), 7.73 (d, *J* = 16.32 Hz, 1H), 7.64–7.59 (m, 4H), 7.26 (d, *J* = 16.32, 1H), 6.89 (dd, *J*<sub>1</sub>=*J*<sub>2</sub> = 15.72 Hz, 1H), 4.49 (t, *J* = 7.23 Hz, 2H), 1.46 (q, *J* = 4.79 Hz, 3H). <sup>13</sup>C-NMR (100 MHz, CDCl<sub>3</sub>, δ, ppm): δ = 193.7, 154.2, 150.1, 145.1, 142.2, 140.8, 133.8, 128.4, 126.6, 126.2, 125.7, 125.6, 123.8, 123.4, 123.2, 121.8, 120.7, 119.6, 109.4, 109.3, 38.0, 13.9. MS (*m/z*): *M*<sup>+</sup> calcd for C<sub>24</sub>H<sub>20</sub>N<sub>2</sub>O: 353.16; found, 353.16. Anal. calcd for C<sub>24</sub>H<sub>20</sub>N<sub>2</sub>O: C 81.78, H 5.67, N 7.95; found: C 81.65, H 5.46, N 7.84. IR (cm<sup>-1</sup>): 1669 (ν<sub>C=O</sub>). (s = singlet; d = doublet; t = triplet; q = quartet; m = multiplet; br = broad.)

### References:

- [S3] Z. G. Yang, N. Zhao, Y. M Sun, F. Miao, Y. Liu, X. Liu, Y. H. Zhang, W. T. Ai, G.F. Song, X. Y. Shen, X. Q. Yu, J. Z. Sun, W.-Y. Wong, *Chem. Commun.* **2012**, 48, 3442–3444.

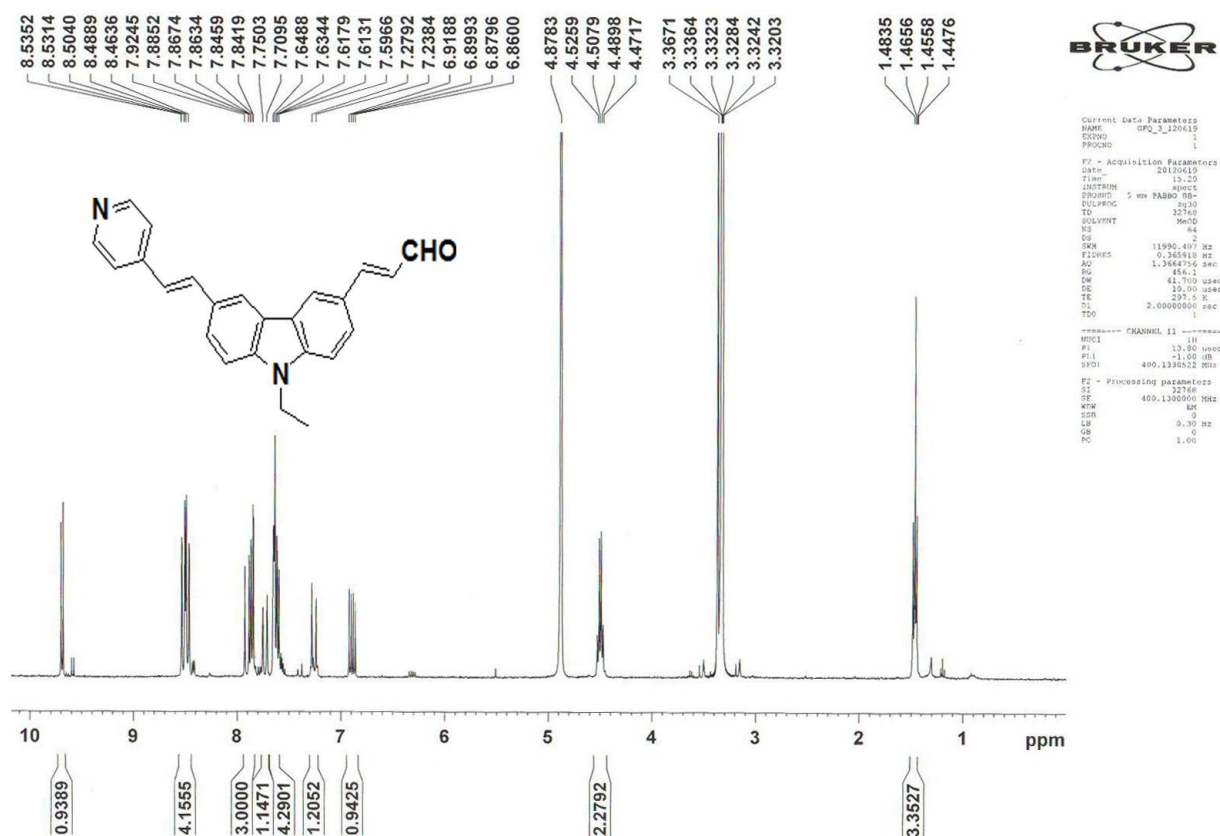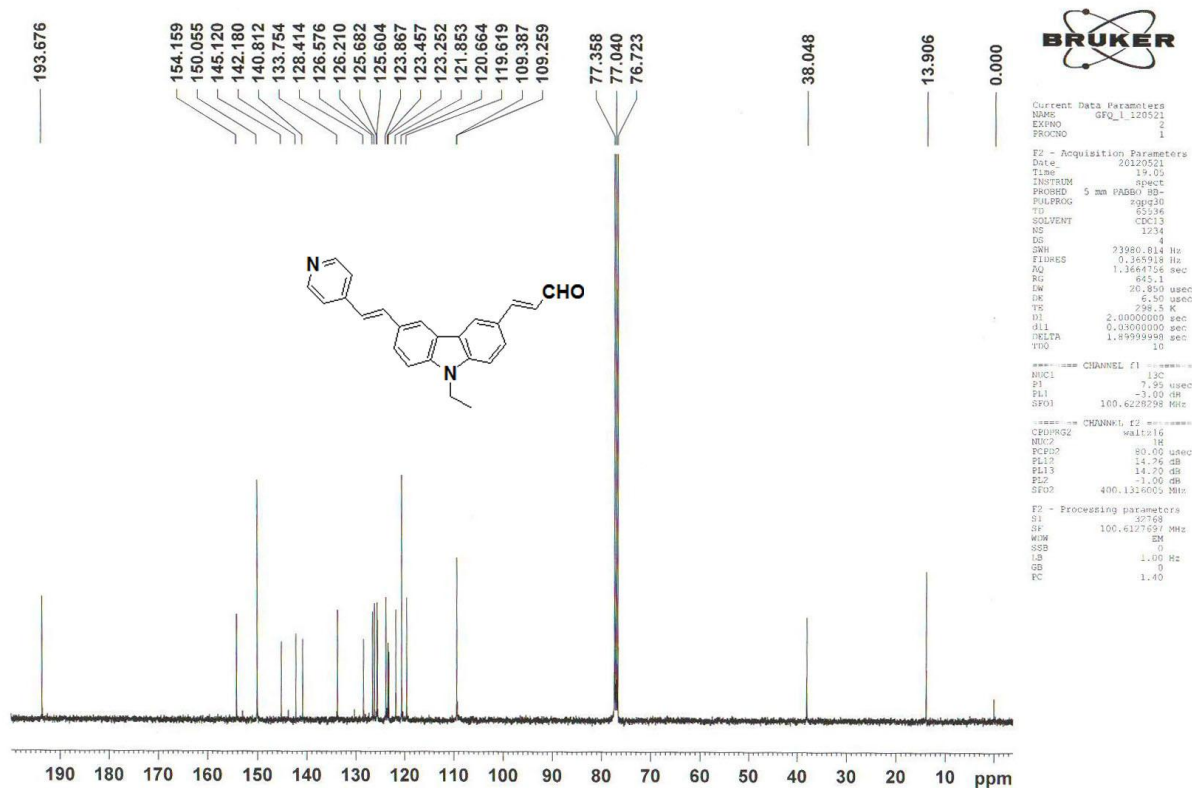

| Sample Name   | 2012-0521-guo   | Position    | Vial 3   | Instrument Name | Instrument 1 | User Name              |                       |
|---------------|-----------------|-------------|----------|-----------------|--------------|------------------------|-----------------------|
| Inj Vol       | -1              | InjPosition |          | SampleType      | Sample       | IRM Calibration Status | Success               |
| Data Filename | 2012-0521-guo.d | ACQ Method  | 0319-1.m | Comment         |              | Acquired Time          | 5/22/2012 10:13:42 AM |

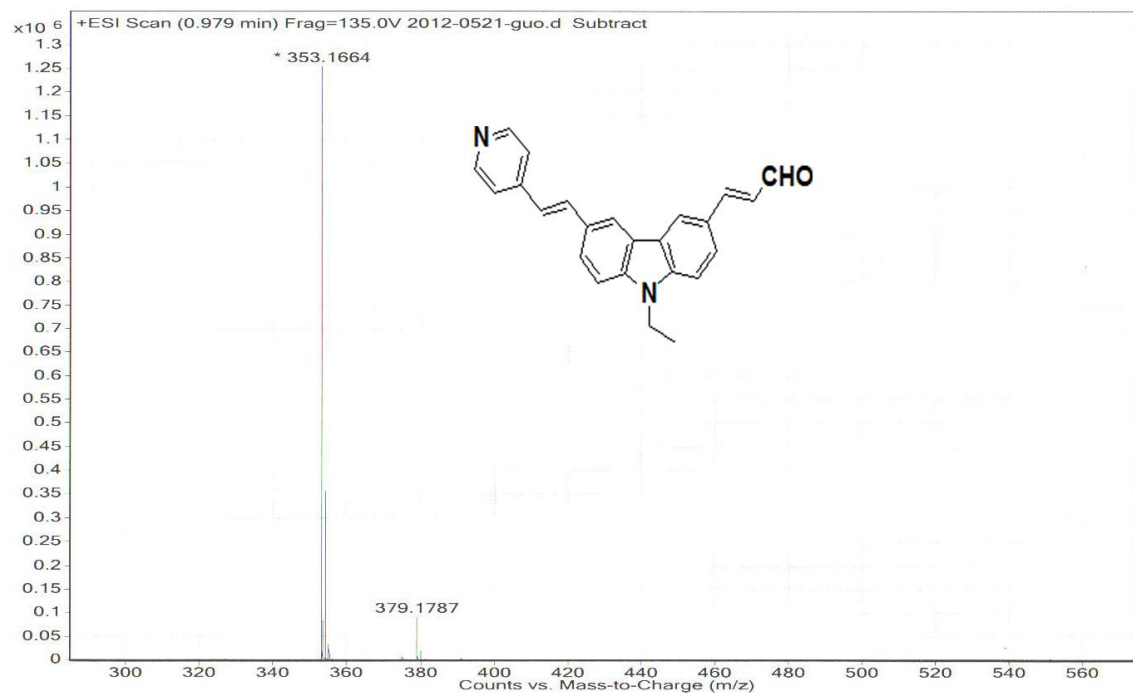

Figure S20. HRMS of **CB1** in EtOH.

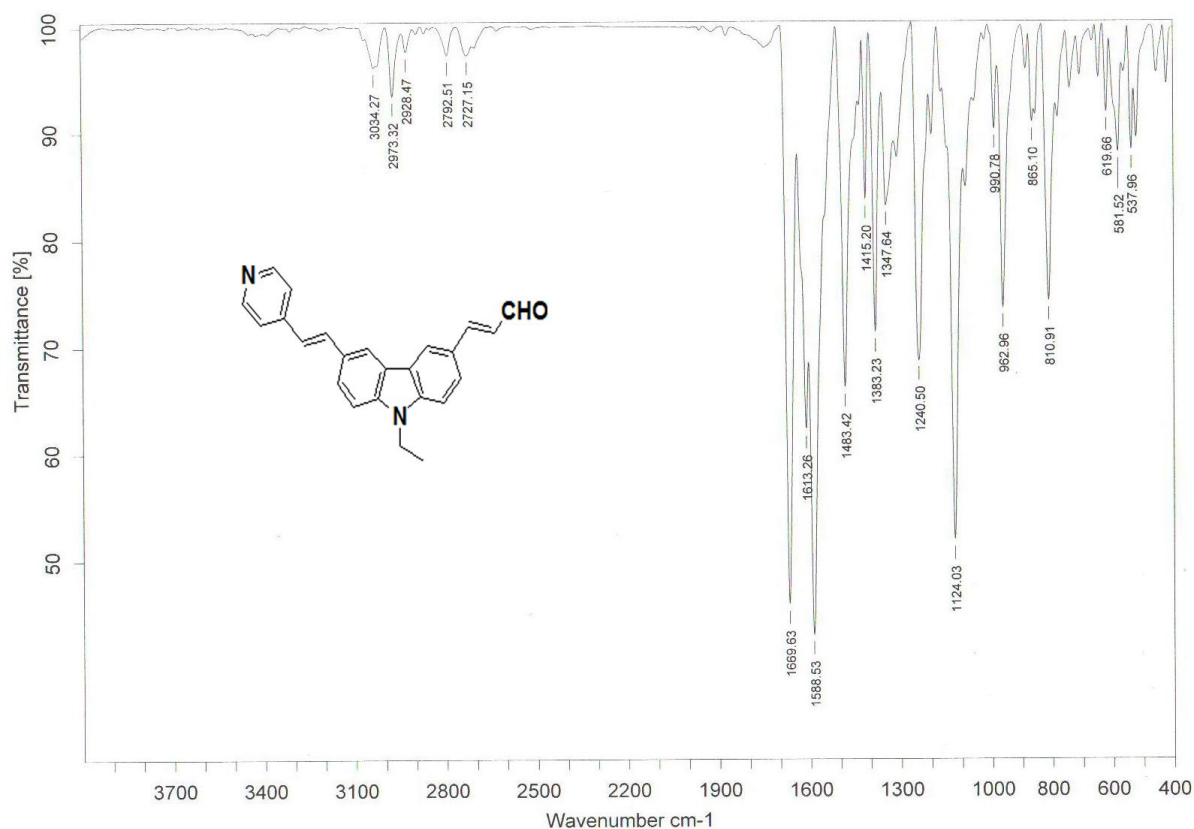

Figure S21. IR spectrum of **CB1**.
